# Supplementary material
Source: Springer Nature journal article supplement (https://www.springermedizin.de/resource/supplementary/12883_2009_356_MOESM4_ESM.pdf/9455220)

## PF/SLR

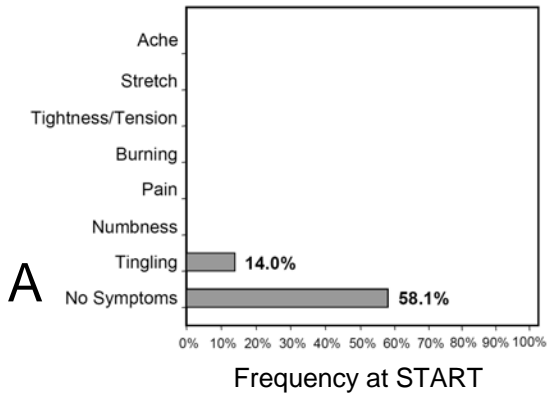

## DF/SLR

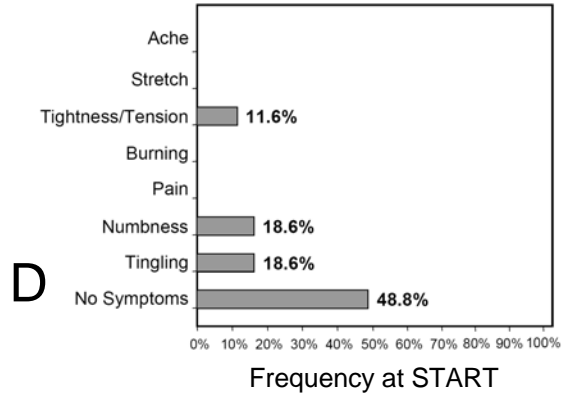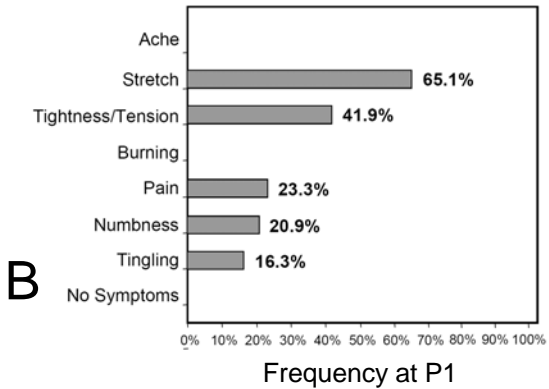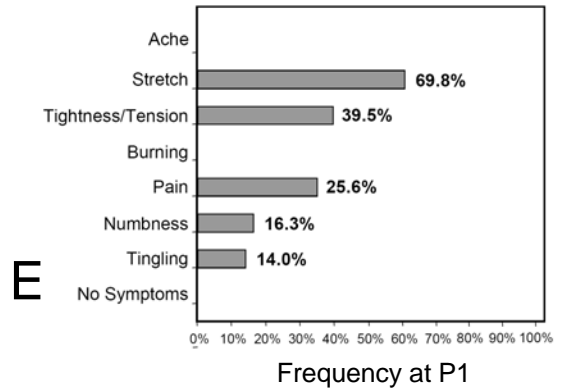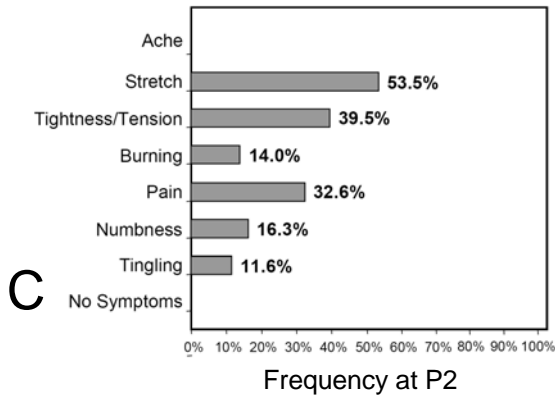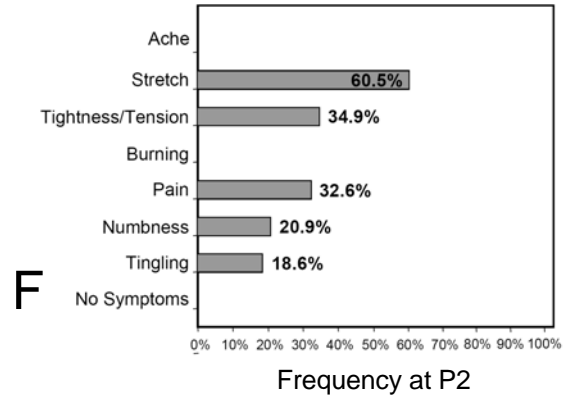

Supplement: MOESM4 [file 9455220]
